# Supplementary material for: Delivering Positive Newborn Screening Results: Cost Analysis of Existing Practice versus Innovative, Co-Designed Strategies from the ReSPoND Study
Source: Int J Neonatal Screen. 2022 Mar 14;8(1):19. doi: 10.3390/ijns8010019 (PMC8951105; doi:10.3390/ijns8010019)
Supplement: Supplementary file 1 [file IJNS-08-00019-s001.zip]

Archive with 6 entries (6 files):
- Figure S1 Existing pathways and implementation of co-designed interventions for models of care based on home-visits.pdf
- Figure S2 Existing pathways and implementation of co-designed interventions for models of care based on telecommunications.pdf
- Table S1 Standard pathway - RESPOND (blinded).pdf
- Table S2 IP home-visit- RESPOND (blinded).pdf
- Table S3 IP teleconsultation - RESPOND (blinded).pdf
- Table S4 Sensitivity analysis time - RESPOND (blinded)_rev.pdf
